# Supplementary material for: Peptides that Mimic RS repeats modulate phase separation of SRSF1, revealing a reliance on combined stacking and electrostatic interactions
Source: eLife. 2023 Mar 2;12:e84412. doi: 10.7554/eLife.84412 (PMC10023157; doi:10.7554/eLife.84412)
Supplement: Supplementary file 1. — Lengths (x) analyzed are x=0, x>2, x>4, x>6, and x>8. p-values were obtained using a two-tailed correlation analysis. A p-value of <0.05 was considered an indicator that increasing repeat length correlated significantly with fraction of proteins found in condensates. A population-based error of 1Nps was used to identify whether the sample size was large enough to draw conclusions from the data (as discussed in more detail in the methods section). Whether a repeat type passed both p-value and population-based error criteria is indicated in the right-most column. [file elife-84412-supp1.xlsx]

## Sheet: Supplementary File 1
Name	Length										P-value (two-tailed)	Pearson's correlation coefficient	Pass the two criteria?
	0		2		4		6		8
	Fraction in condensate	error	Fraction in condensate	error	Fraction in condensate	error	Fraction in condensate	error	Fraction in condensate	error
GG	0.27	0.03	0.34	0.02	0.38	0.05	0.44	0.1	0.49	0.15	0	1	Yes
KK	0.22	0.03	0.36	0.02	0.51	0.06	0.57	0.14	0.67	0.25	0	0.99	Yes
QQ	0.29	0.02	0.35	0.02	0.44	0.07	0.47	0.12	0.51	0.15	0	0.98	Yes
PP	0.3	0.03	0.33	0.02	0.38	0.04	0.42	0.08	0.53	0.12	0.01	0.97	Yes
RG	0.25	0.04	0.33	0.01	0.46	0.07	0.73	0.14	0.71	0.26	0.01	0.96	Yes
RS	0.29	0.04	0.33	0.01	0.42	0.06	0.77	0.13	0.74	0.2	0.02	0.93	Yes
ES	0.27	0.04	0.33	0.01	0.43	0.06	0.56	0.32	0.67	0.71	0	0.99	No
QP	0.31	0.03	0.33	0.02	0.37	0.08	0.41	0.28	0.45	0.45	0	0.99	No
QA	0.27	0.04	0.33	0.01	0.35	0.09	0.46	0.41	0.5	0.71	0	0.98	No
EA	0.21	0.05	0.33	0.01	0.4	0.06	0.46	0.3	0.5	1	0	0.98	No
NA	0.27	0.03	0.34	0.02	0.44	0.16	0.5	1	n/a	n/a	0	1	No
GA	0.28	0.04	0.33	0.01	0.36	0.06	0.43	0.21	0.43	0.58	0	0.98	No
EQ	0.26	0.04	0.34	0.01	0.4	0.09	0.5	0.71	n/a	n/a	0	1	No
QG	0.29	0.03	0.33	0.01	0.39	0.11	0.4	0.5	0.5	1	0.01	0.97	No
LL	0.38	0.04	0.32	0.01	0.22	0.05	0.16	0.16	0.15	0.33	0.01	-0.97	No
CG	0.35	0.02	0.31	0.02	0.23	0.24	0.17	1	0	n/a	0.01	-0.97	No
NQ	0.28	0.03	0.34	0.02	0.41	0.19	n/a	n/a	n/a	n/a	0.01	1	No
GY	0.29	0.03	0.34	0.02	0.37	0.17	0.5	0.71	0.5	1	0.01	0.96	No
KT	0.22	0.04	0.35	0.01	0.42	0.11	0.5	1	n/a	n/a	0.01	0.99	No
KG	0.21	0.04	0.34	0.01	0.45	0.08	0.6	0.41	1	1	0.01	0.96	No
KQ	0.24	0.03	0.34	0.01	0.47	0.09	0.67	0.71	n/a	n/a	0.01	0.99	No
HF	0.32	0.02	0.33	0.02	0.34	0.26	n/a	n/a	n/a	n/a	0.01	1	No
TT	0.29	0.02	0.34	0.02	0.41	0.11	0.44	0.29	0.63	0.45	0.01	0.95	No
PV	0.31	0.04	0.33	0.01	0.39	0.08	0.58	0.38	0.75	0.58	0.01	0.95	No
RH	0.29	0.03	0.34	0.02	0.4	0.15	0.5	1	0	n/a	0.02	0.98	No
SQ	0.29	0.04	0.33	0.01	0.44	0.09	0.5	1	n/a	n/a	0.02	0.98	No
ST	0.31	0.04	0.32	0.01	0.36	0.07	0.36	0.5	n/a	n/a	0.02	0.98	No
DG	0.25	0.04	0.34	0.01	0.41	0.1	0.38	0.58	0.5	1	0.03	0.92	No
PM	0.29	0.02	0.35	0.02	0.43	0.29	1	1	1	1	0.03	0.92	No
DL	0.23	0.05	0.33	0.01	0.39	0.08	0.6	0.58	n/a	n/a	0.03	0.97	No
HH	0.32	0.02	0.33	0.02	0.43	0.15	0.52	0.18	0.47	0.25	0.04	0.89	No
CP	0.35	0.02	0.3	0.02	0.06	0.58	0	n/a	n/a	n/a	0.05	-0.95	No
RP	0.31	0.03	0.33	0.01	0.31	0.08	0.08	1	0	n/a	0.05	-0.88	No
GP	0.31	0.04	0.33	0.01	0.31	0.06	0.44	0.19	0.59	0.32	0.05	0.88	No
KP	0.24	0.04	0.34	0.01	0.42	0.09	0.43	0.58	n/a	n/a	0.05	0.95	No
KN	0.23	0.03	0.36	0.02	0.5	0.12	0.5	1	n/a	n/a	0.06	0.94	No
IM	0.29	0.02	0.35	0.02	0.43	0.41	n/a	n/a	n/a	n/a	0.06	1	No
DF	0.27	0.03	0.35	0.02	0.46	0.15	n/a	n/a	n/a	n/a	0.06	1	No
HS	0.31	0.03	0.33	0.02	0.34	0.14	0.4	0.71	0	n/a	0.06	0.94	No
EN	0.25	0.03	0.35	0.02	0.42	0.11	n/a	n/a	n/a	n/a	0.06	0.99	No
LF	0.33	0.04	0.32	0.01	0.2	0.12	0	n/a	n/a	n/a	0.07	-0.93	No
CC	0.34	0.02	0.28	0.03	0.16	0.38	0.17	1	n/a	n/a	0.07	-0.93	No
KA	0.19	0.05	0.34	0.01	0.46	0.07	0.38	0.41	1	0.71	0.07	0.84	No
RD	0.25	0.04	0.34	0.01	0.49	0.1	0.74	0.24	0.56	0.45	0.08	0.84	No
LM	0.3	0.03	0.33	0.02	0.36	0.19	0.5	1	n/a	n/a	0.08	0.92	No
KF	0.25	0.03	0.35	0.02	0.48	0.19	1	1	n/a	n/a	0.08	0.92	No
KV	0.21	0.04	0.34	0.01	0.45	0.09	1	0.71	n/a	n/a	0.08	0.92	No
CV	0.34	0.02	0.31	0.02	0.27	0.24	n/a	n/a	n/a	n/a	0.08	-0.99	No
CL	0.37	0.03	0.31	0.02	0.26	0.19	0	n/a	n/a	n/a	0.08	-0.92	No
NI	0.27	0.03	0.35	0.02	0.47	0.15	n/a	n/a	n/a	n/a	0.08	0.99	No
HE	0.28	0.02	0.35	0.02	0.39	0.26	n/a	n/a	0	n/a	0.09	0.99	No
DD	0.25	0.02	0.37	0.02	0.47	0.09	0.51	0.19	0.44	0.35	0.09	0.82	No
SS	0.33	0.03	0.32	0.01	0.39	0.04	0.38	0.1	0.39	0.15	0.09	0.82	No
QM	0.29	0.02	0.35	0.02	0.48	0.28	1	1	n/a	n/a	0.1	0.9	No
TP	0.29	0.03	0.33	0.01	0.36	0.09	0.09	1	0	n/a	0.1	-0.81	No
EL	0.23	0.06	0.33	0.01	0.39	0.06	0.38	0.45	n/a	n/a	0.1	0.9	No
HQ	0.3	0.02	0.34	0.02	0.36	0.2	0	n/a	0	n/a	0.1	-0.81	No
EG	0.24	0.05	0.33	0.01	0.4	0.08	0.36	0.5	1	1	0.1	0.81	No
NN	0.3	0.02	0.35	0.02	0.36	0.22	0	n/a	0	n/a	0.1	-0.8	No
DC	0.31	0.02	0.33	0.02	0.21	0.33	0	n/a	n/a	n/a	0.1	-0.9	No
RK	0.2	0.05	0.34	0.01	0.44	0.06	0.42	0.45	0	n/a	0.11	0.9	No
AY	0.29	0.03	0.34	0.02	0.43	0.24	n/a	n/a	n/a	n/a	0.11	0.99	No
KM	0.26	0.02	0.36	0.02	0.41	0.2	n/a	n/a	n/a	n/a	0.11	0.99	No
GF	0.29	0.03	0.33	0.02	0.46	0.11	1	0.71	n/a	n/a	0.11	0.89	No
HD	0.3	0.02	0.34	0.02	0.37	0.38	n/a	n/a	0	n/a	0.11	0.98	No
PI	0.28	0.03	0.34	0.02	0.36	0.14	0	n/a	0	n/a	0.11	-0.79	No
ET	0.26	0.04	0.33	0.01	0.42	0.1	1	0.71	n/a	n/a	0.12	0.88	No
GV	0.27	0.04	0.33	0.01	0.33	0.1	0.38	0.58	1	1	0.12	0.78	No
EE	0.22	0.04	0.34	0.01	0.44	0.04	0.42	0.08	0.4	0.12	0.13	0.77	No
GW	0.34	0.02	0.3	0.02	0.21	0.35	n/a	n/a	n/a	n/a	0.14	-0.98	No
AL	0.27	0.07	0.33	0.01	0.32	0.05	0.23	0.45	0	n/a	0.14	-0.76	No
DN	0.26	0.03	0.36	0.02	0.39	0.19	1	1	n/a	n/a	0.14	0.86	No
EF	0.26	0.03	0.35	0.02	0.38	0.19	1	1	n/a	n/a	0.14	0.86	No
RE	0.21	0.05	0.34	0.01	0.49	0.06	0.62	0.2	0.44	0.38	0.14	0.75	No
PW	0.34	0.02	0.3	0.02	0.2	0.71	n/a	n/a	n/a	n/a	0.14	-0.98	No
AV	0.26	0.05	0.33	0.01	0.35	0.08	0.8	0.5	n/a	n/a	0.15	0.85	No
EM	0.27	0.03	0.35	0.02	0.38	0.17	1	1	n/a	n/a	0.15	0.85	No
IL	0.3	0.04	0.33	0.01	0.25	0.12	0	n/a	n/a	n/a	0.15	-0.85	No
DY	0.27	0.02	0.35	0.02	0.39	0.18	n/a	n/a	n/a	n/a	0.15	0.97	No
MM	0.31	0.02	0.38	0.03	0.22	0.71	0	n/a	n/a	n/a	0.15	-0.85	No
SL	0.35	0.06	0.32	0.01	0.31	0.06	0.33	0.41	0	n/a	0.16	-0.74	No
SG	0.3	0.05	0.33	0.01	0.37	0.05	0.21	0.27	0.13	1	0.16	-0.74	No
RT	0.27	0.03	0.34	0.01	0.41	0.12	0	n/a	0	n/a	0.17	-0.73	No
RM	0.29	0.02	0.35	0.02	0.52	0.28	n/a	n/a	0	n/a	0.17	0.96	No
DM	0.27	0.02	0.36	0.02	0.59	0.25	n/a	n/a	n/a	n/a	0.18	0.96	No
HN	0.31	0.02	0.34	0.02	0.43	0.32	n/a	n/a	0	n/a	0.18	0.96	No
NV	0.26	0.03	0.34	0.02	0.37	0.14	n/a	n/a	n/a	n/a	0.18	0.96	No
GM	0.3	0.02	0.34	0.02	0.47	0.21	n/a	n/a	n/a	n/a	0.18	0.96	No
RI	0.24	0.03	0.34	0.01	0.38	0.17	n/a	n/a	0	n/a	0.18	0.96	No
PL	0.32	0.05	0.32	0.01	0.33	0.06	0.32	0.41	0.25	1	0.18	-0.71	No
DQ	0.27	0.03	0.34	0.02	0.43	0.16	0	n/a	0	n/a	0.18	-0.7	No
TQ	0.3	0.03	0.33	0.02	0.44	0.13	n/a	n/a	n/a	n/a	0.18	0.96	No
CF	0.34	0.02	0.31	0.02	0.19	0.45	n/a	n/a	n/a	n/a	0.19	-0.96	No
GL	0.3	0.06	0.32	0.01	0.3	0.06	0.31	0.33	0.5	0.71	0.19	0.7	No
SF	0.32	0.03	0.32	0.01	0.37	0.11	1	1	n/a	n/a	0.19	0.81	No
EY	0.27	0.03	0.35	0.02	0.38	0.21	n/a	n/a	n/a	n/a	0.19	0.96	No
VL	0.32	0.05	0.32	0.01	0.28	0.08	0.33	0.71	0	n/a	0.19	-0.69	No
RW	0.33	0.02	0.31	0.02	0.24	0.5	n/a	n/a	0	n/a	0.19	-0.95	No
CA	0.34	0.02	0.31	0.02	0.19	0.32	n/a	n/a	n/a	n/a	0.2	-0.95	No
PF	0.31	0.03	0.33	0.02	0.37	0.17	n/a	n/a	n/a	n/a	0.21	0.95	No
AW	0.34	0.02	0.31	0.02	0.17	0.58	n/a	n/a	n/a	n/a	0.21	-0.95	No
TM	0.3	0.02	0.34	0.02	0.5	0.32	n/a	n/a	n/a	n/a	0.21	0.94	No
VV	0.29	0.03	0.34	0.02	0.28	0.13	0	n/a	n/a	n/a	0.22	-0.78	No
QV	0.27	0.03	0.33	0.01	0.43	0.12	0.2	1	0	n/a	0.22	-0.66	No
HL	0.31	0.03	0.33	0.02	0.32	0.13	0.5	1	n/a	n/a	0.22	0.78	No
NY	0.3	0.02	0.34	0.02	0.55	0.25	n/a	n/a	n/a	n/a	0.23	0.94	No
RA	0.23	0.04	0.34	0.01	0.37	0.07	0.38	0.45	0.33	1	0.23	0.66	No
TL	0.32	0.05	0.32	0.01	0.32	0.08	0	n/a	n/a	n/a	0.23	-0.77	No
AM	0.25	0.03	0.35	0.02	0.37	0.23	n/a	n/a	n/a	n/a	0.23	0.93	No
LY	0.31	0.03	0.33	0.02	0.3	0.16	1	1	n/a	n/a	0.23	0.77	No
HV	0.3	0.02	0.34	0.02	0.29	0.27	1	1	n/a	n/a	0.24	0.76	No
TW	0.34	0.02	0.3	0.02	0.11	1	n/a	n/a	n/a	n/a	0.24	-0.93	No
KW	0.31	0.02	0.34	0.02	0.45	0.45	n/a	n/a	n/a	n/a	0.24	0.93	No
LW	0.35	0.02	0.3	0.02	0.06	0.71	n/a	n/a	n/a	n/a	0.24	-0.93	No
GI	0.28	0.03	0.34	0.02	0.28	0.16	0	n/a	n/a	n/a	0.24	-0.76	No
SM	0.29	0.03	0.34	0.02	0.35	0.24	n/a	n/a	n/a	n/a	0.24	0.93	No
HC	0.34	0.02	0.31	0.02	0.13	0.58	n/a	n/a	0	n/a	0.25	-0.93	No
SW	0.34	0.02	0.31	0.02	0.14	0.71	n/a	n/a	n/a	n/a	0.26	-0.92	No
QC	0.34	0.02	0.31	0.02	0.13	0.45	n/a	n/a	n/a	n/a	0.26	-0.92	No
CW	0.33	0.02	0.29	0.03	0	n/a	n/a	n/a	n/a	n/a	0.26	-0.92	No
HY	0.31	0.02	0.33	0.02	0.45	0.45	n/a	n/a	n/a	n/a	0.26	0.92	No
II	0.29	0.02	0.35	0.02	0.35	0.24	n/a	n/a	n/a	n/a	0.26	0.92	No
FF	0.33	0.02	0.32	0.02	0.23	0.35	n/a	n/a	n/a	n/a	0.26	-0.92	No
AI	0.25	0.03	0.34	0.01	0.26	0.15	0	n/a	n/a	n/a	0.26	-0.74	No
HG	0.31	0.02	0.33	0.02	0.33	0.2	0	n/a	0	n/a	0.27	-0.73	No
DV	0.23	0.04	0.34	0.01	0.36	0.11	n/a	n/a	n/a	n/a	0.27	0.91	No
RC	0.33	0.02	0.32	0.02	0.19	0.32	n/a	n/a	0	n/a	0.27	-0.91	No
SY	0.32	0.03	0.32	0.02	0.33	0.16	0.25	1	n/a	n/a	0.27	-0.73	No
SV	0.32	0.04	0.32	0.01	0.34	0.08	0.17	1	n/a	n/a	0.27	-0.73	No
PY	0.31	0.02	0.33	0.02	0.34	0.21	0	n/a	n/a	n/a	0.27	-0.73	No
DW	0.32	0.02	0.33	0.02	0.5	0.33	n/a	n/a	n/a	n/a	0.28	0.91	No
CY	0.33	0.02	0.31	0.02	0.13	1	n/a	n/a	n/a	n/a	0.28	-0.91	No
HM	0.31	0.02	0.34	0.02	0.67	0.71	n/a	n/a	n/a	n/a	0.28	0.91	No
VI	0.28	0.03	0.34	0.02	0.3	0.16	0	n/a	n/a	n/a	0.28	-0.72	No
TY	0.31	0.02	0.33	0.02	0.53	0.24	n/a	n/a	n/a	n/a	0.29	0.9	No
IW	0.33	0.02	0.31	0.02	0	n/a	n/a	n/a	n/a	n/a	0.29	-0.9	No
EV	0.22	0.05	0.34	0.01	0.39	0.08	0.33	1	n/a	n/a	0.29	0.71	No
DP	0.27	0.03	0.33	0.01	0.34	0.13	0.33	1	0	n/a	0.3	-0.59	No
NC	0.32	0.02	0.32	0.02	0.22	0.38	n/a	n/a	n/a	n/a	0.32	-0.88	No
DA	0.23	0.04	0.34	0.01	0.39	0.12	0.33	1	n/a	n/a	0.32	0.68	No
DE	0.21	0.04	0.34	0.01	0.45	0.05	0.45	0.19	0.33	0.5	0.32	0.57	No
RF	0.29	0.03	0.33	0.02	0.33	0.2	n/a	n/a	0	n/a	0.32	0.88	No
TC	0.34	0.02	0.31	0.02	0.22	0.32	1	1	n/a	n/a	0.32	0.68	No
YY	0.32	0.02	0.33	0.02	0.52	0.28	n/a	n/a	n/a	n/a	0.32	0.87	No
QW	0.32	0.02	0.32	0.02	0	n/a	n/a	n/a	n/a	n/a	0.33	-0.87	No
RQ	0.28	0.03	0.33	0.01	0.43	0.1	0.33	1	0	n/a	0.35	-0.54	No
CM	0.32	0.02	0.33	0.02	0	n/a	n/a	n/a	n/a	n/a	0.35	-0.85	No
TV	0.26	0.04	0.33	0.01	0.33	0.08	0	n/a	n/a	n/a	0.36	-0.64	No
NW	0.32	0.02	0.33	0.02	0.08	1	n/a	n/a	n/a	n/a	0.36	-0.85	No
EW	0.32	0.02	0.33	0.02	0	n/a	n/a	n/a	n/a	n/a	0.36	-0.85	No
HW	0.33	0.02	0.3	0.03	1	1	n/a	n/a	n/a	n/a	0.36	0.85	No
SP	0.33	0.04	0.32	0.01	0.37	0.05	0.3	0.28	0.43	0.58	0.36	0.53	No
RR	0.28	0.03	0.34	0.02	0.33	0.07	0.39	0.29	0	n/a	0.37	-0.52	No
HT	0.3	0.02	0.34	0.02	0.39	0.29	0	n/a	0	n/a	0.37	-0.63	No
RN	0.27	0.03	0.34	0.02	0.36	0.17	0	n/a	0	n/a	0.39	-0.61	No
NG	0.28	0.03	0.33	0.02	0.38	0.14	0	n/a	n/a	n/a	0.4	-0.6	No
DT	0.26	0.03	0.34	0.02	0.36	0.14	0	n/a	n/a	n/a	0.4	-0.6	No
MY	0.31	0.02	0.35	0.02	0	n/a	n/a	n/a	n/a	n/a	0.4	-0.81	No
KC	0.31	0.02	0.34	0.02	0.1	0.45	n/a	n/a	n/a	n/a	0.41	-0.8	No
TN	0.29	0.03	0.34	0.02	0.4	0.19	0	n/a	n/a	n/a	0.42	-0.58	No
IF	0.3	0.03	0.33	0.02	0.15	0.29	n/a	n/a	n/a	n/a	0.43	-0.78	No
NM	0.3	0.02	0.35	0.02	0.43	0.33	0	n/a	n/a	n/a	0.44	-0.56	No
TF	0.31	0.03	0.33	0.02	0.25	0.17	n/a	n/a	n/a	n/a	0.45	-0.76	No
AA	0.26	0.04	0.33	0.01	0.37	0.04	0.36	0.09	0.31	0.15	0.45	0.45	No
MF	0.31	0.02	0.34	0.02	0.2	0.71	n/a	n/a	n/a	n/a	0.45	-0.76	No
TI	0.28	0.03	0.34	0.02	0.43	0.13	0	n/a	n/a	n/a	0.47	-0.53	No
NP	0.28	0.03	0.34	0.02	0.43	0.14	0	n/a	n/a	n/a	0.48	-0.52	No
RV	0.25	0.04	0.34	0.01	0.39	0.11	0	n/a	0	n/a	0.48	-0.52	No
HA	0.29	0.02	0.34	0.02	0.17	0.35	n/a	n/a	n/a	n/a	0.5	-0.71	No
VW	0.34	0.02	0.3	0.02	0.43	0.41	n/a	n/a	n/a	n/a	0.51	0.69	No
SA	0.29	0.05	0.33	0.01	0.37	0.06	0.47	0.35	0	n/a	0.51	-0.39	No
VM	0.3	0.02	0.34	0.02	0.33	0.26	n/a	n/a	n/a	n/a	0.51	0.69	No
QL	0.29	0.05	0.33	0.01	0.34	0.07	0.22	0.71	n/a	n/a	0.53	-0.47	No
SN	0.3	0.03	0.33	0.02	0.42	0.1	0.33	0.71	n/a	n/a	0.53	0.47	No
KY	0.26	0.03	0.35	0.02	0.32	0.23	n/a	n/a	n/a	n/a	0.55	0.65	No
QI	0.26	0.03	0.34	0.02	0.32	0.2	n/a	n/a	n/a	n/a	0.56	0.64	No
EC	0.31	0.02	0.33	0.02	0.26	0.3	n/a	n/a	n/a	n/a	0.56	-0.64	No
NL	0.27	0.04	0.33	0.01	0.34	0.11	0.2	1	n/a	n/a	0.57	-0.43	No
FY	0.32	0.02	0.32	0.02	0.31	0.45	n/a	n/a	n/a	n/a	0.57	-0.63	No
HP	0.31	0.02	0.33	0.02	0.37	0.16	0.42	0.45	0.17	1	0.57	-0.35	No
TA	0.28	0.04	0.33	0.01	0.39	0.08	0.33	0.58	0.2	1	0.57	-0.35	No
EP	0.28	0.04	0.33	0.01	0.35	0.07	0.43	0.26	0.29	0.45	0.57	0.34	No
IY	0.3	0.02	0.33	0.02	0.25	0.32	n/a	n/a	n/a	n/a	0.58	-0.62	No
CI	0.33	0.02	0.32	0.02	0.33	0.45	n/a	n/a	n/a	n/a	0.58	0.61	No
HK	0.27	0.02	0.36	0.02	0.41	0.2	0.33	1	0.33	1	0.58	0.33	No
DI	0.24	0.03	0.35	0.02	0.46	0.13	0	n/a	n/a	n/a	0.6	-0.4	No
KI	0.21	0.04	0.36	0.01	0.42	0.14	0	n/a	n/a	n/a	0.61	-0.39	No
RY	0.3	0.03	0.33	0.02	0.25	0.26	n/a	n/a	0	n/a	0.62	-0.56	No
KL	0.19	0.06	0.34	0.01	0.4	0.07	0	n/a	n/a	n/a	0.64	-0.36	No
SC	0.37	0.02	0.3	0.02	0.18	0.22	0.33	1	n/a	n/a	0.65	-0.35	No
EI	0.21	0.04	0.35	0.01	0.46	0.11	0	n/a	n/a	n/a	0.66	-0.34	No
KE	0.18	0.05	0.34	0.01	0.49	0.05	0.63	0.2	0.2	1	0.67	0.26	No
KD	0.22	0.04	0.35	0.01	0.5	0.09	0.5	0.71	0	n/a	0.72	-0.22	No
VF	0.3	0.03	0.33	0.02	0.28	0.2	n/a	n/a	n/a	n/a	0.73	-0.42	No
TG	0.28	0.04	0.33	0.01	0.37	0.1	0.6	0.58	0	n/a	0.73	-0.21	No
SI	0.29	0.04	0.33	0.01	0.27	0.13	n/a	n/a	n/a	n/a	0.75	-0.39	No
QF	0.29	0.03	0.34	0.02	0.27	0.27	n/a	n/a	n/a	n/a	0.8	-0.31	No
VY	0.3	0.03	0.33	0.02	0.31	0.2	n/a	n/a	n/a	n/a	0.81	0.3	No
AF	0.3	0.03	0.33	0.02	0.29	0.18	n/a	n/a	n/a	n/a	0.81	-0.29	No
KS	0.22	0.04	0.34	0.01	0.43	0.08	0.6	0.58	0	n/a	0.84	-0.13	No
QY	0.29	0.02	0.34	0.02	0.31	0.3	n/a	n/a	n/a	n/a	0.84	0.25	No
PA	0.29	0.04	0.33	0.01	0.37	0.05	0.27	0.2	0.33	0.38	0.88	0.1	No
DS	0.27	0.04	0.33	0.01	0.43	0.06	0.34	0.28	0.29	0.71	0.88	0.1	No
FW	0.34	0.02	0.28	0.02	0.33	1	n/a	n/a	n/a	n/a	0.89	-0.17	No
RL	0.24	0.06	0.33	0.01	0.34	0.07	0.25	0.58	0	n/a	0.89	0.11	No
NF	0.29	0.02	0.34	0.02	0.28	0.28	n/a	n/a	n/a	n/a	0.92	-0.12	No
HI	0.29	0.02	0.34	0.02	0.29	0.35	n/a	n/a	n/a	n/a	0.94	-0.09	No
YW	0.33	0.02	0.3	0.03	0.33	1	n/a	n/a	n/a	n/a	1	0	No
MW	0.33	0.02	0.32	0.03	n/a	n/a	n/a	n/a	n/a	n/a	n/a	n/a	No
WW	0.33	0.01	0.29	0.05	n/a	n/a	n/a	n/a	n/a	n/a	n/a	n/a	No
