# Supplementary material for: Peptides that Mimic RS repeats modulate phase separation of SRSF1, revealing a reliance on combined stacking and electrostatic interactions
Source: eLife. 2023 Mar 2;12:e84412. doi: 10.7554/eLife.84412 (PMC10023157; doi:10.7554/eLife.84412)
Supplement: Supplementary file 2. — Percentage of proteins in condensates was found through Python’s random selection tool 50 different times for each population. Average and standard deviation are indicated at the top of the sheet. [file elife-84412-supp2.xlsx]

## Sheet: n=14 size matched percentages
	RS2				RS4				RS6				RS8
RRM	+	-	-		+	-	-		+	-	-		+	-	-
Repeat	+	+	-		+	+	-		+	+	-		+	+	-
mean percentage in condensates	81.4286	29.7143	25.7143		89.5714	40.7143	31.7143		92.2857	68.1429	30.2857		92.8571	60.7143	30.7143
standard deviation	10.6044	11.8438	11.9871		7.93166	13.6331	12.8393		5.17096	10.8192	10.9484		1.43551e-14	7.25136	12.7653
	78.5714	42.8571	21.4286		71.4286	21.4286	21.4286		92.8571	57.1429	28.5714		92.8571	71.4286	35.7143
	78.5714	35.7143	7.14286		78.5714	57.1429	42.8571		85.7143	64.2857	28.5714		92.8571	57.1429	21.4286
	92.8571	35.7143	50		92.8571	50	28.5714		92.8571	78.5714	21.4286		92.8571	64.2857	42.8571
	78.5714	7.14286	14.2857		78.5714	28.5714	21.4286		92.8571	57.1429	21.4286		92.8571	78.5714	28.5714
	78.5714	35.7143	28.5714		92.8571	57.1429	28.5714		85.7143	78.5714	14.2857		92.8571	64.2857	50
	85.7143	50	50		92.8571	21.4286	35.7143		92.8571	57.1429	21.4286		92.8571	57.1429	14.2857
	78.5714	14.2857	21.4286		71.4286	21.4286	50		100	64.2857	21.4286		92.8571	57.1429	42.8571
	85.7143	28.5714	21.4286		100	21.4286	35.7143		85.7143	64.2857	21.4286		92.8571	57.1429	21.4286
	85.7143	50	28.5714		85.7143	50	14.2857		100	71.4286	35.7143		92.8571	64.2857	35.7143
	85.7143	14.2857	14.2857		85.7143	35.7143	42.8571		85.7143	78.5714	21.4286		92.8571	71.4286	28.5714
	92.8571	14.2857	28.5714		92.8571	50	28.5714		92.8571	85.7143	28.5714		92.8571	57.1429	14.2857
	92.8571	28.5714	35.7143		92.8571	57.1429	28.5714		92.8571	64.2857	21.4286		92.8571	57.1429	21.4286
	71.4286	21.4286	21.4286		100	14.2857	14.2857		100	64.2857	50		92.8571	57.1429	21.4286
	85.7143	21.4286	28.5714		92.8571	35.7143	35.7143		92.8571	78.5714	42.8571		92.8571	71.4286	42.8571
	100	35.7143	28.5714		92.8571	50	42.8571		92.8571	64.2857	14.2857		92.8571	57.1429	21.4286
	78.5714	35.7143	35.7143		78.5714	50	42.8571		85.7143	78.5714	28.5714		92.8571	57.1429	50
	92.8571	50	21.4286		92.8571	35.7143	14.2857		100	64.2857	14.2857		92.8571	71.4286	21.4286
	64.2857	21.4286	28.5714		92.8571	35.7143	14.2857		85.7143	71.4286	42.8571		92.8571	57.1429	42.8571
	85.7143	28.5714	35.7143		92.8571	57.1429	35.7143		92.8571	64.2857	28.5714		92.8571	64.2857	21.4286
	71.4286	21.4286	7.14286		92.8571	57.1429	21.4286		92.8571	50	35.7143		92.8571	64.2857	35.7143
	50	14.2857	14.2857		92.8571	35.7143	28.5714		92.8571	57.1429	42.8571		92.8571	71.4286	21.4286
	100	14.2857	14.2857		85.7143	50	42.8571		100	71.4286	35.7143		92.8571	64.2857	35.7143
	64.2857	7.14286	42.8571		92.8571	57.1429	50		100	71.4286	42.8571		92.8571	57.1429	42.8571
	71.4286	28.5714	50		92.8571	42.8571	28.5714		85.7143	71.4286	0		92.8571	50	14.2857
	92.8571	21.4286	21.4286		92.8571	50	35.7143		92.8571	64.2857	28.5714		92.8571	50	35.7143
	85.7143	42.8571	28.5714		85.7143	35.7143	64.2857		85.7143	42.8571	28.5714		92.8571	64.2857	57.1429
	71.4286	28.5714	21.4286		85.7143	35.7143	35.7143		85.7143	57.1429	35.7143		92.8571	71.4286	7.14286
	78.5714	21.4286	35.7143		100	64.2857	21.4286		92.8571	71.4286	28.5714		92.8571	64.2857	64.2857
	92.8571	57.1429	21.4286		100	21.4286	21.4286		92.8571	71.4286	35.7143		92.8571	57.1429	21.4286
	64.2857	28.5714	35.7143		92.8571	57.1429	21.4286		92.8571	50	28.5714		92.8571	57.1429	35.7143
	85.7143	35.7143	7.14286		92.8571	42.8571	50		92.8571	57.1429	28.5714		92.8571	42.8571	50
	78.5714	21.4286	35.7143		100	57.1429	50		85.7143	57.1429	35.7143		92.8571	64.2857	35.7143
	85.7143	42.8571	28.5714		92.8571	21.4286	21.4286		92.8571	71.4286	50		92.8571	57.1429	21.4286
	71.4286	50	14.2857		78.5714	21.4286	21.4286		85.7143	71.4286	42.8571		92.8571	50	35.7143
	85.7143	28.5714	21.4286		100	57.1429	50		100	85.7143	21.4286		92.8571	50	14.2857
	78.5714	42.8571	21.4286		85.7143	35.7143	14.2857		85.7143	78.5714	21.4286		92.8571	57.1429	50
	92.8571	28.5714	35.7143		92.8571	42.8571	28.5714		100	78.5714	42.8571		92.8571	64.2857	35.7143
	100	21.4286	7.14286		78.5714	35.7143	35.7143		100	71.4286	35.7143		92.8571	50	35.7143
	85.7143	28.5714	14.2857		92.8571	42.8571	50		92.8571	64.2857	21.4286		92.8571	57.1429	28.5714
	78.5714	35.7143	28.5714		92.8571	35.7143	35.7143		92.8571	78.5714	42.8571		92.8571	64.2857	35.7143
	78.5714	21.4286	21.4286		92.8571	28.5714	28.5714		100	85.7143	14.2857		92.8571	71.4286	28.5714
	92.8571	28.5714	0		85.7143	35.7143	7.14286		92.8571	78.5714	35.7143		92.8571	57.1429	28.5714
	78.5714	42.8571	28.5714		100	50	21.4286		92.8571	64.2857	50		92.8571	64.2857	21.4286
	71.4286	42.8571	35.7143		92.8571	21.4286	35.7143		92.8571	64.2857	28.5714		92.8571	64.2857	35.7143
	85.7143	35.7143	21.4286		85.7143	64.2857	42.8571		92.8571	92.8571	28.5714		92.8571	64.2857	7.14286
	85.7143	21.4286	14.2857		92.8571	42.8571	42.8571		100	50	21.4286		92.8571	64.2857	14.2857
	78.5714	28.5714	42.8571		100	50	7.14286		92.8571	71.4286	21.4286		92.8571	57.1429	35.7143
	85.7143	28.5714	21.4286		78.5714	21.4286	28.5714		85.7143	71.4286	35.7143		92.8571	57.1429	28.5714
	57.1429	14.2857	50		71.4286	42.8571	21.4286		85.7143	78.5714	50		92.8571	50	21.4286
	78.5714	28.5714	21.4286		78.5714	28.5714	42.8571		85.7143	50	35.7143		92.8571	64.2857	21.4286

## Sheet: n=6 size matched percentages
	RS2					RS4					RS6					RS8
RRM	+	+	-	-		+	+	-	-		+	+	-	-		+	+	-	-
Repeat	+	-	+	-		+	-	+	-		+	-	+	-		+	-	+	-
mean percentage in condensates	79.6667	83.3333	30.6667	34.6667		87.3333	80.6667	43.3333	25.3333		93.6667	74.3333	68	29.3333		91	81.3333	62.3333	29.6667
standard deviation	14.7888	7.17757e-14	24.8259	23.0449		12.3993	15.1934	14.6772	18.5164		9.45811	19.6944	18.0827	18.6141		8.39096	16.7142	19.2872	17.5901
	66.6667	83.3333	16.6667	33.3333		83.3333	66.6667	50	16.6667		100	50	66.6667	50		83.3333	66.6667	50	33.3333
	50	83.3333	33.3333	50		100	50	16.6667	16.6667		100	66.6667	50	16.6667		83.3333	33.3333	66.6667	33.3333
	83.3333	83.3333	33.3333	33.3333		100	83.3333	33.3333	66.6667		100	83.3333	100	16.6667		83.3333	100	50	33.3333
	83.3333	83.3333	33.3333	33.3333		100	50	50	50		100	83.3333	83.3333	0		83.3333	100	83.3333	50
	83.3333	83.3333	33.3333	66.6667		66.6667	83.3333	50	16.6667		100	83.3333	100	16.6667		100	83.3333	83.3333	16.6667
	83.3333	83.3333	33.3333	50		100	83.3333	50	33.3333		83.3333	100	50	33.3333		100	100	33.3333	50
	100	83.3333	33.3333	66.6667		83.3333	83.3333	66.6667	33.3333		83.3333	100	33.3333	50		83.3333	100	66.6667	16.6667
	66.6667	83.3333	100	0		83.3333	100	50	0		100	100	66.6667	16.6667		83.3333	83.3333	66.6667	16.6667
	83.3333	83.3333	50	83.3333		83.3333	83.3333	50	16.6667		83.3333	83.3333	83.3333	16.6667		100	83.3333	50	50
	83.3333	83.3333	50	16.6667		100	66.6667	50	33.3333		100	66.6667	100	33.3333		100	100	83.3333	0
	83.3333	83.3333	0	16.6667		83.3333	66.6667	16.6667	33.3333		83.3333	83.3333	50	33.3333		100	100	50	16.6667
	66.6667	83.3333	50	16.6667		83.3333	50	66.6667	16.6667		100	66.6667	83.3333	50		83.3333	50	83.3333	33.3333
	50	83.3333	66.6667	33.3333		66.6667	100	66.6667	16.6667		83.3333	66.6667	66.6667	0		83.3333	83.3333	16.6667	50
	83.3333	83.3333	16.6667	0		83.3333	66.6667	33.3333	50		83.3333	100	83.3333	16.6667		100	66.6667	66.6667	33.3333
	66.6667	83.3333	16.6667	83.3333		50	66.6667	50	16.6667		83.3333	50	66.6667	33.3333		83.3333	83.3333	66.6667	50
	66.6667	83.3333	33.3333	66.6667		100	66.6667	50	0		100	66.6667	50	16.6667		83.3333	50	83.3333	0
	100	83.3333	16.6667	16.6667		83.3333	66.6667	16.6667	33.3333		66.6667	66.6667	83.3333	16.6667		100	66.6667	83.3333	33.3333
	100	83.3333	66.6667	16.6667		83.3333	100	50	50		83.3333	100	66.6667	0		100	83.3333	83.3333	50
	83.3333	83.3333	33.3333	33.3333		83.3333	100	66.6667	33.3333		100	100	50	16.6667		83.3333	66.6667	66.6667	33.3333
	83.3333	83.3333	50	16.6667		66.6667	66.6667	33.3333	0		100	50	100	83.3333		100	83.3333	33.3333	33.3333
	66.6667	83.3333	0	0		83.3333	66.6667	33.3333	16.6667		66.6667	50	33.3333	0		83.3333	50	50	33.3333
	50	83.3333	100	66.6667		83.3333	83.3333	50	0		100	50	50	16.6667		83.3333	66.6667	16.6667	66.6667
	83.3333	83.3333	33.3333	33.3333		100	100	33.3333	16.6667		100	100	50	33.3333		100	66.6667	50	0
	100	83.3333	33.3333	33.3333		100	66.6667	33.3333	50		100	50	66.6667	50		83.3333	83.3333	100	16.6667
	83.3333	83.3333	0	16.6667		83.3333	100	50	16.6667		83.3333	83.3333	83.3333	50		100	66.6667	66.6667	33.3333
	83.3333	83.3333	16.6667	50		100	83.3333	33.3333	16.6667		100	66.6667	50	66.6667		100	50	66.6667	66.6667
	100	83.3333	50	16.6667		100	66.6667	50	0		100	50	66.6667	50		83.3333	83.3333	50	33.3333
	100	83.3333	0	33.3333		100	83.3333	66.6667	0		100	100	83.3333	16.6667		100	100	83.3333	16.6667
	83.3333	83.3333	33.3333	16.6667		100	100	66.6667	0		83.3333	66.6667	83.3333	33.3333		83.3333	83.3333	66.6667	0
	100	83.3333	0	83.3333		83.3333	83.3333	16.6667	50		100	66.6667	50	33.3333		83.3333	66.6667	66.6667	33.3333
	100	83.3333	16.6667	66.6667		100	66.6667	50	33.3333		100	66.6667	66.6667	16.6667		100	83.3333	66.6667	16.6667
	83.3333	83.3333	33.3333	0		100	100	33.3333	33.3333		83.3333	50	50	33.3333		100	83.3333	83.3333	33.3333
	66.6667	83.3333	16.6667	16.6667		100	66.6667	66.6667	33.3333		100	83.3333	83.3333	33.3333		100	83.3333	50	33.3333
	50	83.3333	0	33.3333		83.3333	83.3333	33.3333	33.3333		100	50	100	33.3333		83.3333	83.3333	83.3333	16.6667
	83.3333	83.3333	33.3333	33.3333		66.6667	100	50	16.6667		100	66.6667	33.3333	33.3333		83.3333	66.6667	16.6667	50
	83.3333	83.3333	33.3333	33.3333		83.3333	83.3333	33.3333	50		83.3333	83.3333	66.6667	16.6667		83.3333	100	66.6667	33.3333
	83.3333	83.3333	0	0		100	83.3333	33.3333	33.3333		100	66.6667	50	50		100	100	50	16.6667
	50	83.3333	66.6667	33.3333		83.3333	100	50	0		100	100	66.6667	33.3333		100	100	66.6667	33.3333
	83.3333	83.3333	16.6667	50		100	83.3333	33.3333	33.3333		83.3333	100	66.6667	50		100	83.3333	83.3333	0
	83.3333	83.3333	50	33.3333		83.3333	83.3333	33.3333	16.6667		100	50	50	16.6667		83.3333	100	83.3333	33.3333
	83.3333	83.3333	0	16.6667		83.3333	100	33.3333	33.3333		100	33.3333	66.6667	16.6667		83.3333	100	33.3333	50
	66.6667	83.3333	16.6667	33.3333		83.3333	83.3333	33.3333	83.3333		100	50	66.6667	0		100	66.6667	66.6667	33.3333
	83.3333	83.3333	0	16.6667		83.3333	100	50	0		100	83.3333	83.3333	33.3333		83.3333	100	50	33.3333
	83.3333	83.3333	16.6667	66.6667		100	83.3333	50	16.6667		83.3333	100	66.6667	33.3333		100	83.3333	66.6667	50
	100	83.3333	50	33.3333		100	83.3333	33.3333	16.6667		83.3333	83.3333	83.3333	16.6667		83.3333	83.3333	66.6667	16.6667
	66.6667	83.3333	66.6667	66.6667		83.3333	83.3333	16.6667	16.6667		100	66.6667	66.6667	16.6667		83.3333	83.3333	66.6667	50
	83.3333	83.3333	50	33.3333		66.6667	83.3333	50	33.3333		100	83.3333	83.3333	33.3333		83.3333	100	66.6667	16.6667
	66.6667	83.3333	0	50		66.6667	100	33.3333	33.3333		100	50	83.3333	16.6667		100	83.3333	33.3333	0
	100	83.3333	0	16.6667		100	50	33.3333	33.3333		100	100	50	66.6667		100	83.3333	66.6667	0
	66.6667	83.3333	33.3333	16.6667		83.3333	83.3333	66.6667	16.6667		100	100	66.6667	50		83.3333	100	66.6667	33.3333
