# Supplementary material for: Peptides that Mimic RS repeats modulate phase separation of SRSF1, revealing a reliance on combined stacking and electrostatic interactions
Source: eLife. 2023 Mar 2;12:e84412. doi: 10.7554/eLife.84412 (PMC10023157; doi:10.7554/eLife.84412)
Supplement: Supplementary file 3. — Values used correspond to those displayed in Figure 1A. p-values were obtained using Fisher’s exact test. [file elife-84412-supp3.xlsx]

## Sheet: Sheet1
Proteins in Condensates					Proteins not in Condensates
Two-sided p-value = 0.0013		With RRM?			Two-sided p-value = 0.1202		With RRM?
		No	Yes				No	Yes
With RS or SR?	No	519	5		With RS or SR?	No	1283	1
	Yes	4666	163			Yes	9901	37
Two-sided p-value <0.0001		With RRM?			Two-sided p-value = 0.0072		With RRM?
		No	Yes				No	Yes
With RSRS or SRSR?	No	4969	126		With RSRS or SRSR?	No	10826	33
	Yes	216	42			Yes	358	5
Two-sided p-value <0.0001		With RRM?			Two-sided p-value = 0.0018		With RRM?
		No	Yes				No	Yes
With RSRSRS or SRSRSR?	No	5147	143		With RSRSRS or SRSRSR?	No	11167	36
	Yes	38	25			Yes	17	2
Two-sided p-value <0.0001		With RRM?			Two-sided p-value = 0.0301		With RRM?
		No	Yes				No	Yes
With RSRSRSRS or SRSRSRSR?	No	5172	155		With RSRSRSRS or SRSRSRSR?	No	11176	37
	Yes	13	13			Yes	8	1
