# Supplementary material for: Peptides that Mimic RS repeats modulate phase separation of SRSF1, revealing a reliance on combined stacking and electrostatic interactions
Source: eLife. 2023 Mar 2;12:e84412. doi: 10.7554/eLife.84412 (PMC10023157; doi:10.7554/eLife.84412)
Supplement: Supplementary file 4. — Correlation between the fraction of proteins in condensates and the presence of a threshold number of short repeats or percentage R/S composition. p-values were obtained using Fisher’s exact test. [file elife-84412-supp4.xlsx]

## Sheet: Sheet1
Figure 1C (p-values obtained using 2-tailed Fisher's Exact Test)
Number of Dipeptide Repeats						Number of Tetrapeptide Repeats
Without an RRM						Without an RRM
p < 0.0001 (significant)		In condensates?				p < 0.0001 (significant)		In condensates?
		No	Yes					No	Yes
With > 10 RS dipeptides?	No	10747	4839			With > 2 RS tetrapeptides?	No	11155	5136
	Yes	437	346				Yes	29	49
With >10 RS dipeptides						With >2 RS tetrapeptides
p < 0.0001 (significant)		In condensates?				p = 0.0196 (significant)		In condensates?
		No	Yes					No	Yes
With an RRM domain?	No	437	346			With an RRM domain?	No	29	49
	Yes	10	32				Yes	4	27
Figure 1-Figure Supplement 1C (p-values obtained using 2-tailed Fisher's Exact Test)
Percent R/S Composition
Without an RRM
p < 0.0001 (significant)		In condensates?
		No	Yes
With > 40% RS composition?	No	9789	4424
	Yes	1381	761
With >40% RS composition?
p < 0.0001 (significant)		In condensates?
		No	Yes
With an RRM domain?	No	1381	761
	Yes	4	32
