# Supplementary material for: Peptides that Mimic RS repeats modulate phase separation of SRSF1, revealing a reliance on combined stacking and electrostatic interactions
Source: eLife. 2023 Mar 2;12:e84412. doi: 10.7554/eLife.84412 (PMC10023157; doi:10.7554/eLife.84412)
Supplement: Supplementary file 5. — Distances (r) correspond to the length between the cysteine to which the paramagnetic center is attached and the NH hydrogen on the backbone of each residue under observation. Distances were measured using the Pymol measurement feature. Residue 42 is near to two peptides. Therefore, two distances are provided for residue 42. Bleached residues are expected to be within 12–15 Å of the paramagnetic center (Iwahara et al., 2007). [file elife-84412-supp5.xlsx]

## Sheet: Sheet1
Restraints			Unrestrained				Residue 88 Restrained
Simulation Time		0 ns	93 ns	126 ns	146 ns	201 ns	0 ns	17 ns
Hotspot Residue	Neighboring Peptide	Closest r (Å)	Closest r (Å)	Closest r (Å)	Closest r (Å)	Closest r (Å)	Closest r (Å)	Closest r (Å)
K30	peptide 1	16.4	14	15.2	8.6	8.1	16.4	7.8
I42	peptide 1	26.8	16.2	15.4	20.2	19.5	26.8	10.4
	peptide 3	18.2	14.2	20.3	17.9	16.3	18.2	20.3
I45	peptide 1	18.8	8.4	12.4	13.2	11.9	18.8	7.2
D80	peptide 3	11.6	11.9	11.2	14.1	13.5	11.6	11.4
F88	peptide 2	8.9	13.4	21.2	21.2	12.7	8.9	15.2
134	peptide 4	13.7	7.6	7.9	9.3	6.6	13.7	8
150	peptide 4	10.5	9.9	10.2	12.4	8.2	10.5	7.8
